# Supplementary material for: Conceptualising cultural safety at an Indigenous-focused midwifery practice in Toronto, Canada: qualitative interviews with Indigenous and non-Indigenous clients
Source: PubMed Central journal article supplement — BMJ Open. 2020 Sep 29;10(9):e038168. doi: 10.1136/bmjopen-2020-038168 (PMC7526316; doi:10.1136/bmjopen-2020-038168), 2020-09-29
Supplement: bmjopen-2020-038168supp001.pdf [file bmjopen-2020-038168supp001.pdf]

### **Appendix A: SGMT Client Interview Guide**

#### **For all participants:**

First of all, I was hoping to learn a little bit more about yourself and your history of midwifery care.

1. What number baby is this?
2. Did you have a midwife for prior pregnancy/birth?
3. Did you have an SGMT midwife for prior pregnancy/birth?
4. How old are you?
5. How far did you get in school? (no high school, some high school, graduated high school, some college/university, graduated college/university)
6. Who lives with you?

These next questions focus on your health care experiences at SGMT.

1. Why did you choose SGMT for your care?
2. What kinds of support did you need during your pregnancy/birth/post-partum?
3. What specific things were you hoping SGMT would provide?
4. Were these needs met?
5. Were there prenatal, birthing, and/or reproductive needs that were not met? Which ones?
6. Did you have an Indigenous midwife or an Indigenous student midwife as part of your care team?

These next questions focus on culturally safe care. Imagine a relationship with a caregiver in which you feel comfortable, respected and able to be yourself.

1. How would it look?
2. What are the things that the caregiver does to make you feel comfortable and respected and able to be yourself?
3. What about the space where the care is being provided? How does it look?
4. What are the things in the space that make you feel comfortable and respected and able to be yourself?
5. a) Think now about your care experience at SGMT; how did your care compare with what you have just described?  
b) How did the physical space of SGMT impact your care experience?

This final set of questions focus on identity.

#### **For the Indigenous/Aboriginal participants:**

1. Do you identify as Indigenous/Aboriginal? How do you identify?
2. Are there times you don't tell people you are Indigenous?
3. Did the midwife share any specific examples of Indigenous/Aboriginal teachings or stories during care? If yes, can you share some examples?
4. How did you feel about this (the sharing/not sharing teachings)?
5. What about ceremonies? If yes, can you share some examples?
6. How did you feel about this?

7. Would you have wanted the midwives to share more?
8. What are your suggestions for a good way for the midwives could share this type of knowledge and practice?
9. Has your understanding of being Indigenous changed since becoming a client at SGMT? If yes, how?
10. How did or didn't your care at SGMT influence or change your family relationships?
11. Has your involvement in Indigenous community events, programs, or services changed since becoming a client at SGMT? If yes, how?

**For the non-Indigenous participants:**

1. How do you identify?
2. Did the midwife share any specific examples of Indigenous/Aboriginal teachings or stories during care? If yes, can you share some examples?
3. How did you feel about this (the sharing/not sharing)?
4. What about ceremonies? If yes, can you share some examples?
5. How did you feel about this?
6. Would you have wanted the midwives to share more (Indigenous/Aboriginal teachings, stories, ceremonies; other cultural, spiritual knowledge and practice)?
7. What are your suggestions for a good way for the midwives to share this type of knowledge and practice?
8. Has your understanding of Indigenous people changed since becoming a client at SGMT? If yes, how?
9. Has your involvement or desire to be involved in Indigenous community events, programs, or services changed since becoming a client at SGMT?
